# Supplementary material for: Ultrasensitive electrochemical detection of DNA hybridization using Au/Fe3O4 magnetic composites combined with silver enhancement
Source: Royal Society of Chemistry journal article supplement (doi:10.1039/b923847f), 2010-01-01
Supplement: b923847f.pdf [file b923847f.pdf]

## Supplementary Information (ESI) for:

# Ultrasensitive electrochemical detection of DNA hybridization using Au/Fe<sub>3</sub>O<sub>4</sub> magnetic composites combined with silver enhancement

Yu-Hui Bai, Jin-Yi Li, Jing-Juan Xu,\* and Hong-Yuan Chen

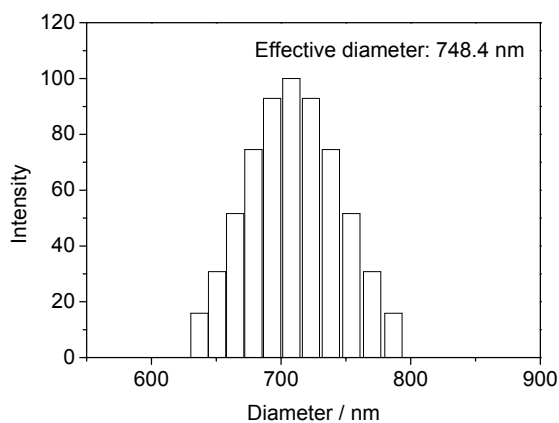

Figure S-1. The distribution of diameter of Fe<sub>3</sub>O<sub>4</sub>/PSS/PDDA/Au composites using DLS method. Liquid: water.

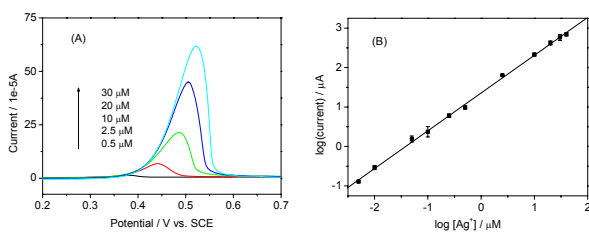

Figure S-2. (A) LSV of different concentrations of Ag<sup>+</sup> ions after pre-concentration at a GC electrode; (B) the calibration plots of the determination of Ag<sup>+</sup> ions. Error bars represent S. D., n=3.

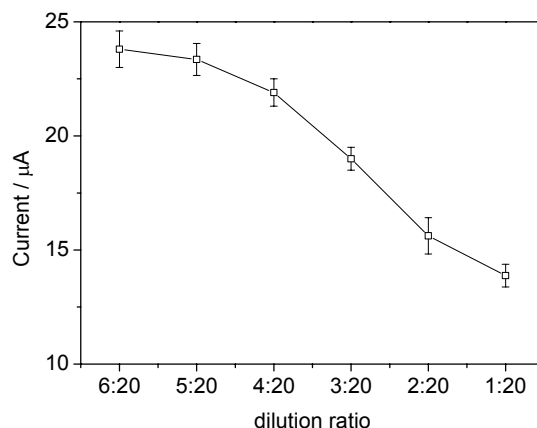

Figure S-3. Effect of the dilution ratio of Fe<sub>3</sub>O<sub>4</sub>/PSS/PDDA/Au-probe 2 conjugate upon the anodic stripping peak current. Other parameters of the assay: 1 μM probe 1, 5 fM target DNA. Error bars represent S. D., n=3.
